# Supplementary material for: DNA strand exchange reaction activated by cationic comb-type copolymers having ureido groups
Source: Royal Society of Chemistry journal article supplement (doi:10.1039/c4bm00207e), 2014-01-01
Supplement: c4bm00207e1.pdf [file c4bm00207e1.pdf]

## Supplementary Information

# DNA Strand Exchange Reaction Activated by Cationic Comb-type Copolymer Having Ureido Groups

Naohiko Shimada, Wei Song, Atsushi Maruyama\*

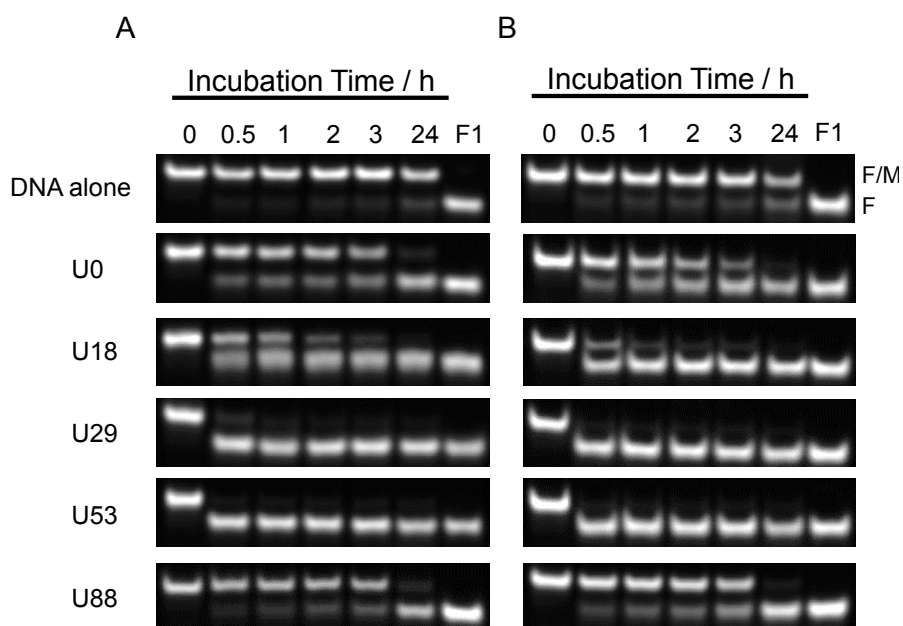

**Fig. S1** DNA strand exchange reaction analyzed by 13 % PAGE. ssDNA (NF) was added to dsDNA (F/M) in 10 mM HEPES (pH 7.5) containing 50 (A) or 150 mM(B) NaCl in the absence or presence of copolymers (N/P = 5). After incubation at 30 °C the mixture was separated by 13% PAGE.
